# Supplementary material for: High performance low-bandgap perovskite solar cells based on a high-quality mixed Sn–Pb perovskite film prepared by vacuum-assisted thermal annealing
Source: Royal Society of Chemistry journal article supplement (doi:10.1039/c8ta05444d), 2018-01-01
Supplement: c8ta05444d1.pdf [file c8ta05444d1.pdf]

## Supporting Information

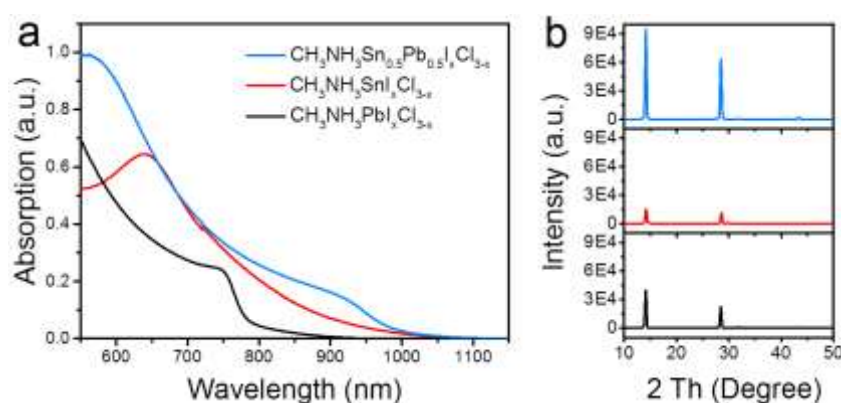

**Figure S1.** (a) Absorption and (b) XRD patterns of  $\text{CH}_3\text{NH}_3\text{Sn}_{0.5}\text{Pb}_{0.5}\text{I}_x\text{Cl}_{3-x}$ ,  $\text{CH}_3\text{NH}_3\text{SnI}_x\text{Cl}_{3-x}$  and  $\text{CH}_3\text{NH}_3\text{PbI}_x\text{Cl}_{3-x}$  thin films.

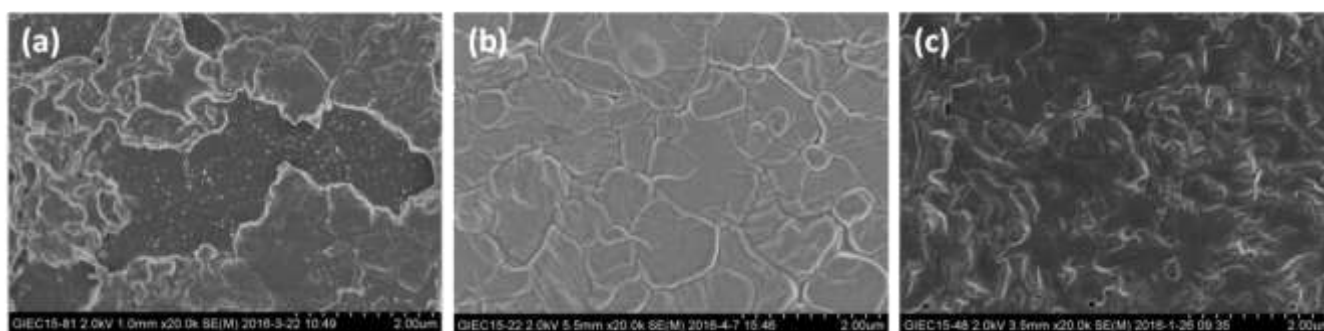

**Figure S2.** Top-view SEM images of (a)  $\text{CH}_3\text{NH}_3\text{SnI}_x\text{Cl}_{3-x}$ , (b)  $\text{CH}_3\text{NH}_3\text{Sn}_{0.5}\text{Pb}_{0.5}\text{I}_x\text{Cl}_{3-x}$  and (c)  $\text{CH}_3\text{NH}_3\text{PbI}_x\text{Cl}_{3-x}$  thin films annealed in a nitrogen environment.

**Table S1.** Energy-dispersive spectrometric measurement of elements contained in  $\text{CH}_3\text{NH}_3\text{Sn}_{0.5}\text{Pb}_{0.5}\text{I}_x\text{Cl}_{3-x}$  thin film annealed in various environments.

| Annealing Time | Condition | Pb    | Sn    | I     | Cl   |
|----------------|-----------|-------|-------|-------|------|
| 0.5h           | Vacuum    | 13.09 | 14.33 | 72.56 | --   |
|                | Nitrogen  | 14.09 | 13.96 | 61.59 | 9.34 |
| 1h             | Vacuum    | 13.62 | 12.54 | 73.81 | --   |
|                | Nitrogen  | 13.02 | 12.04 | 71.19 | 3.71 |
| 1.5h           | Vacuum    | 14.49 | 13.88 | 71.61 | --   |
|                | Nitrogen  | 12.72 | 11.88 | 75.34 | --   |

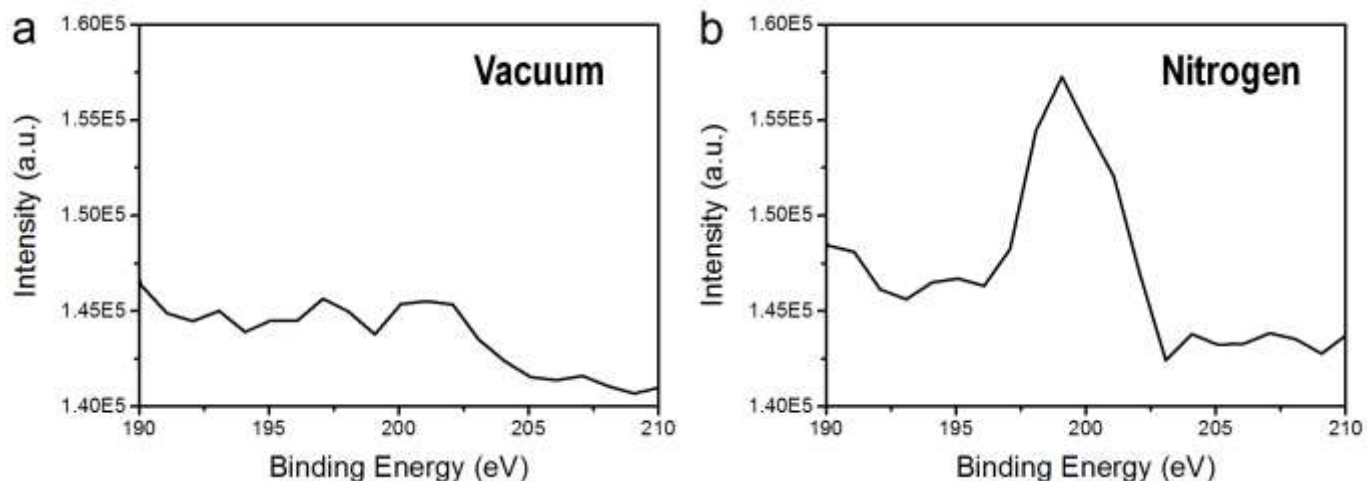

**Figure S3.** X-ray photoelectron spectroscopy measurement of Cl2p signal in  $\text{CH}_3\text{NH}_3\text{Sn}_{0.5}\text{Pb}_{0.5}\text{I}_x\text{Cl}_{3-x}$  films annealed in (a) a vacuum environment and (b) a nitrogen environment for 1 hour.

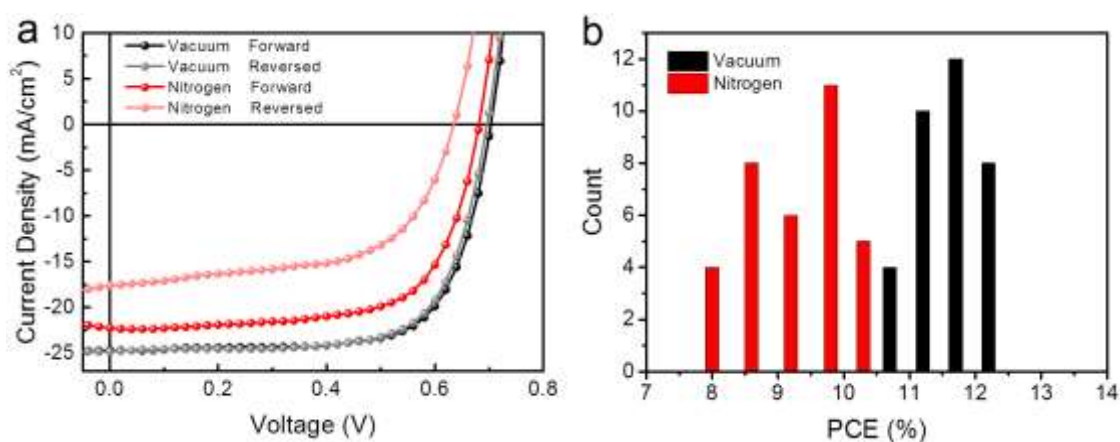

**Figure S4.** (a) Hysteresis properties of PVSCs fabricated in various annealing environments. (b) Statistical performances of 34 PVSCs fabricated in various annealing environments.

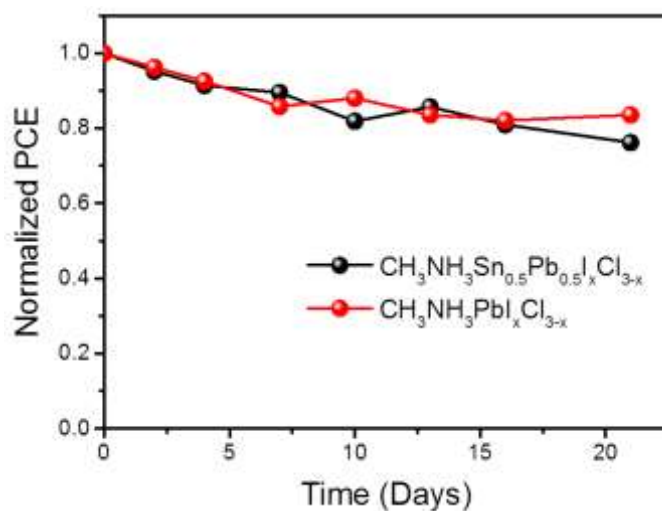

**Figure S5.** Long-term stabilities of  $\text{CH}_3\text{NH}_3\text{Sn}_{0.5}\text{Pb}_{0.5}\text{I}_x\text{Cl}_{3-x}$  and  $\text{CH}_3\text{NH}_3\text{PbI}_x\text{Cl}_{3-x}$  solar cells. All the devices were stored in an  $\text{N}_2$ -filled glovebox.
